# Supplementary material
Source: PubMed Central journal article supplement (PMC4966330)
Supplement: JCI87715.sd.pdf [file JCI87715.sd.pdf]

## Supplementary Figures

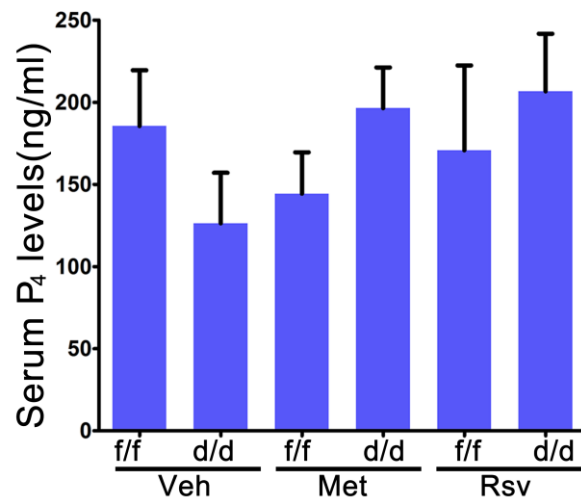

**Supplementary Figure 1.** Serum progesterone (P<sub>4</sub>) levels in Met or Rsv pretreated *p53<sup>f/f</sup>* and *p53<sup>d/d</sup>* females on day 16 (n=4). No significant changes in P<sub>4</sub> levels were noted between the two groups.

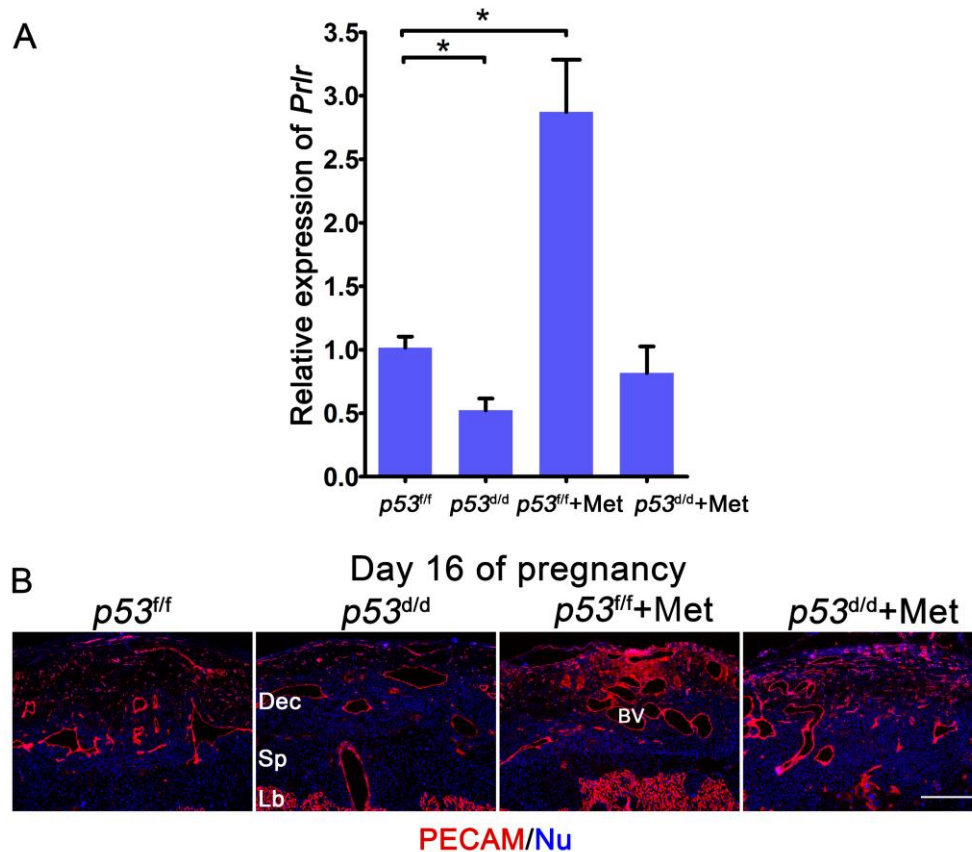

**Supplementary Figure 2.** Met increases *Prlr* mRNA expression and blood vessel density in  $p53^{d/d}$  mice. (A) Expression of *Prlr* mRNA was decreased in day 16  $p53^{d/d}$  deciduae while Met significantly increased *Prlr* mRNA in  $p53^{fl/fl}$  deciduae with more than 50% increasing but not reach into significant in  $p53^{d/d}$  deciduae. (N=4, \* $p<0.05$ , mean  $\pm$  SEM, ANOVA). (B) Density of PECAM-positive blood vessels was lower in  $p53^{d/d}$  deciduae, but was upregulated in Met pretreated  $p53^{d/d}$  deciduae. Dec: Decidua; Sp: spongiotrophoblast; Lb: labyrinth; BV: blood vessel (Bar, 500  $\mu$ m).

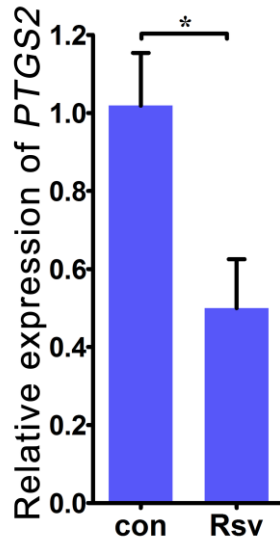

**Supplementary Figure 3.** Rsv inhibited *PTGS2* expression in human decidualized cells differentiated in vitro from human uterine fibroblast cells (HuF) (N=3, \*p< 0.05, mean  $\pm$  SEM, Student's *t* test).

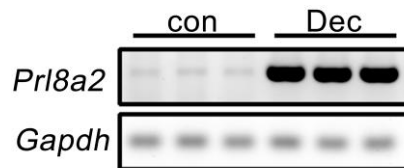

**Supplementary Figure 4.** Expression of *Prl8a2* (decidual marker gene) in stromal cells decidualized in vitro. *Prl8a2* was highly expressed in decidual cells *in vitro* exposed to 10 nM estradiol-17 $\beta$  and 1  $\mu$ M P<sub>4</sub>. *Gapdh* was used as an internal control, con: Non-decidualized, Dec: Decidualized.

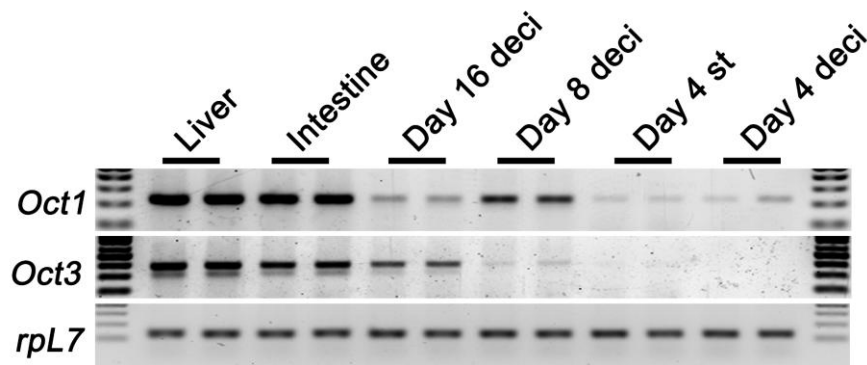

**Supplementary Figure 5.** *Oct1* and *Oct3* expression in different tissues and comparison of AMPK-mTORC1 signaling in floxed versus WT decidual cells. Levels of *Oct1* and *Oct3* transcripts, as determined by RT-PCR, in liver, intestine, day 16 deciduae, day 8 deciduae, as well as day 4 isolated stromal cells and decidualized stromal cells in vitro. Deci, decidua; Day 4 st, stromal cells isolated on day 4; Day 4 deci, day 4 stromal cells decidualized in vitro.

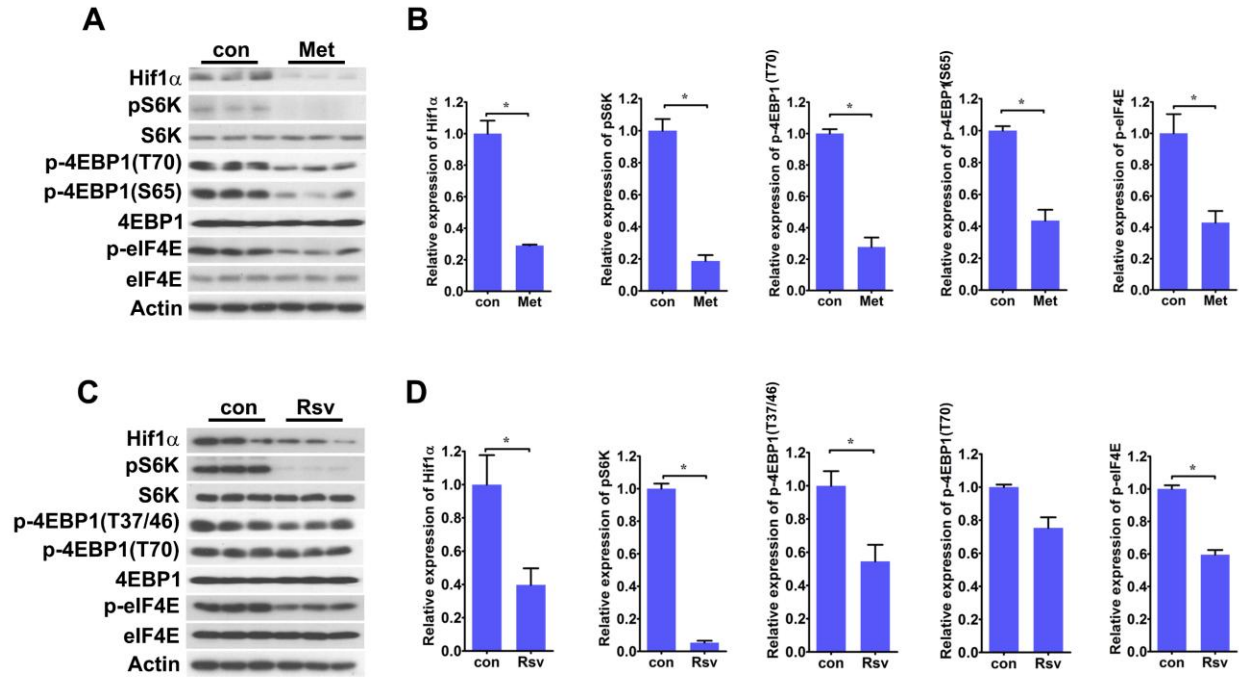

**Supplementary Figure 6.** Met and Rsv attenuate several other mTORC1 targets in stromal cells decidualized in vitro. (A-D) levels of Hif1 $\alpha$ , pS6K (Thr389), p-4EBP1 (Thr37/46), p-4EBP1 (Thr70), p-4EBP1 (Ser65) and p-eIF4E (Ser209) are downregulated by Met and Rsv, respectively (N=3, \*p<0.05, mean  $\pm$  SEM, Student's *t* test).

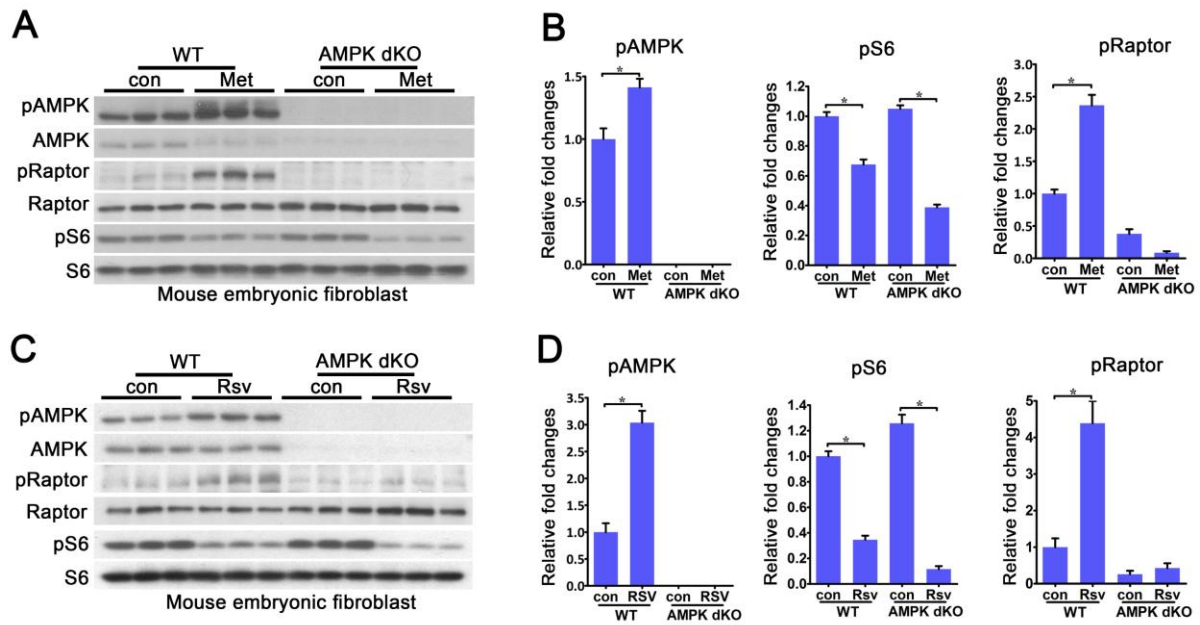

**Supplementary Figure 7.** Met or Rsv downregulated mTORC1 signaling in AMPK dKO MEFs. (**A to D**) levels of pS6 were downregulated in WT and AMPK dKO (AMPK $\alpha$ 1 and AMPK $\alpha$ 2) MEFs by Met and Rsv with increased levels of pAMPK and its target pRaptor in WT MEFs (N=3, \* $p$ <0.05, mean  $\pm$  SEM, Student's  $t$  test).

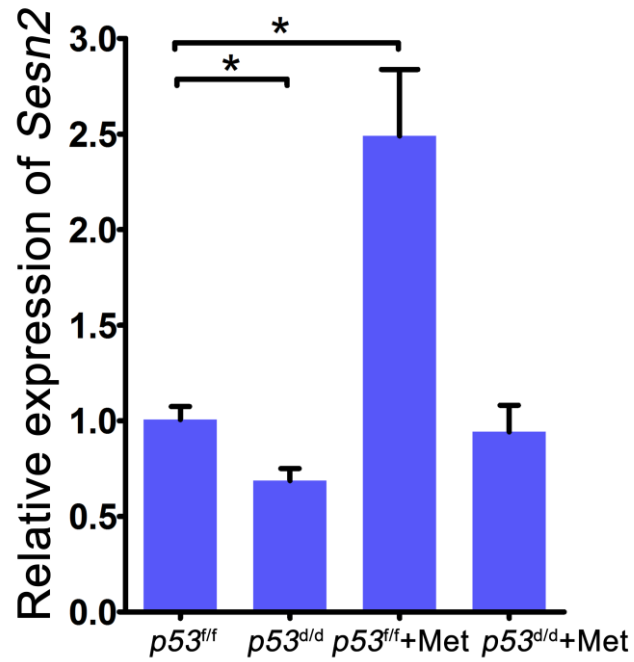

**Supplementary Figure 8.** Expression of *Sesn2* mRNA decreased in D16  $p53^{d/d}$  deciduae. Met significantly increased *Sesn2* mRNA in  $p53^{fl/fl}$  deciduae and more than 37% in  $p53^{d/d}$  deciduae which did not reach statistical significance (N=4, \* $p < 0.05$ , mean  $\pm$  SEM, ANOVA).

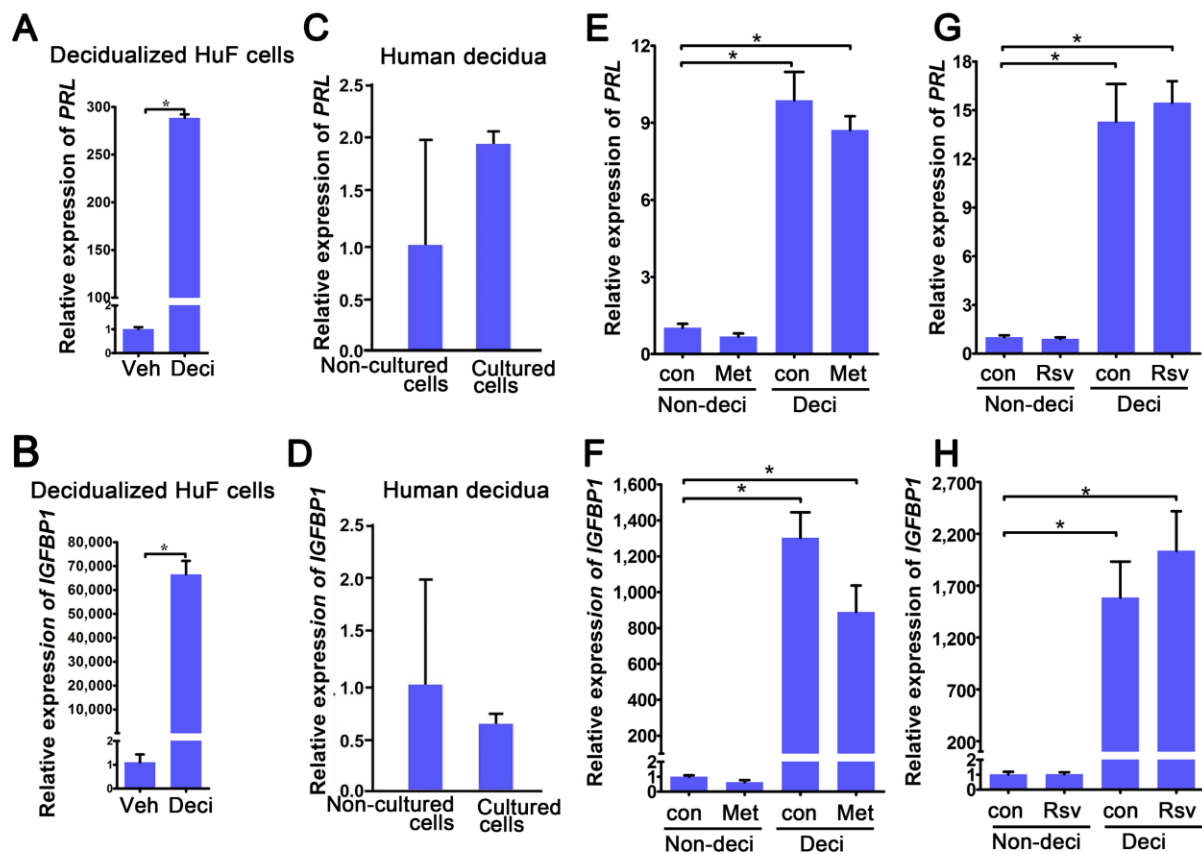

**Supplementary Figure 9.** Expression of human decidual cell makers in HuF cells and non-cultured and cultured decidual cells, as determined by real-time PCR. **(A and B)** Markers of human decidual cells *IGFBP1* and *PRL*, were strongly induced in human uterine fibroblasts (HuF) cells after decidualization with E<sub>2</sub> (10 nM), MPA (1 μM) and PGE<sub>2</sub> (10 nM) (N=3, \*p<0.05, mean ± SEM, Student's *t* test). **(C and D)** *PRL* and *IGFBP1* transcript levels were comparable between non-cultured and cultured decidual cells (N=3, \*p<0.05, mean ± SEM, Student's *t* test). **(E to H)** Decidual markers were highly expressed in HuF cells decidualized in vitro compared with much lower levels in non-decidualized cultured cells. Met or Rsv treatment maintained the expression of decidual cell markers in vitro (N=3, \*p<0.05, mean ± SEM, ANOVA).

| Use | Antibody          | Source          | Catalog No. | Dilution | Type     | Fixative |
|-----|-------------------|-----------------|-------------|----------|----------|----------|
| IHC | $\gamma$ H2AX     | Millipore       | 05-636      | 1:500    | Paraffin | NBF      |
| IHC | Sesn2             | proteintech     | 10795-1-AP  | 1:200    | Paraffin | NBF      |
| IF  | pAMPK(Thr172)     | Cell Signaling  | 2535s       | 1:100    | Frozen   | PFA      |
| IF  | PECAM             | BD              | 553370      | 1:300    | Frozen   | PFA      |
| IF  | Hoechst 33342     | Life technology | H3570       | 1:500    | Frozen   | PFA      |
| WB  | pAMPK(Thr172)     | Cell Signaling  | 2535s       | 1:1000   | N.A.     | N.A.     |
| WB  | AMPK              | Cell Signaling  | 5831s       | 1:1000   | N.A.     | N.A.     |
| WB  | pRaptor (Ser792)  | Cell Signaling  | 2083s       | 1:1000   | N.A.     | N.A.     |
| WB  | Raptor            | Cell Signaling  | 2280s       | 1:1000   | N.A.     | N.A.     |
| WB  | pS6 (Ser235/236)  | Cell Signaling  | 2211s       | 1:2000   | N.A.     | N.A.     |
| WB  | S6                | Cell Signaling  | 2217s       | 1:2000   | N.A.     | N.A.     |
| WB  | Sesn2             | Proteintech     | 10795-1-AP  | 1:2000   | N.A.     | N.A.     |
| WB  | p53               | Santa Cruz      | sc-6243     | 1:1000   | N.A.     | N.A.     |
| WB  | Actin             | Santa Cruz      | sc-1615     | 1:1000   | N.A.     | N.A.     |
| WB  | pS6K (Thr389)     | Cell Signaling  | 9234        | 1:1000   | N.A.     | N.A.     |
| WB  | S6K               | Cell Signaling  | 2708        | 1:1000   | N.A.     | N.A.     |
| WB  | Hif1 $\alpha$     | Cell Signaling  | 14179S      | 1:1000   | N.A.     | N.A.     |
| WB  | p-4EBP1(Thr37/46) | Cell Signaling  | 2855        | 1:2000   | N.A.     | N.A.     |
| WB  | p-4EBP1(Ser65)    | Cell Signaling  | 9451        | 1:2000   | N.A.     | N.A.     |
| WB  | p-4EBP1(Thr70)    | Cell Signaling  | 9455        | 1:2000   | N.A.     | N.A.     |
| WB  | p-eIF4E (Ser209)  | Cell Signaling  | 9741        | 1:2000   | N.A.     | N.A.     |
| WB  | eIF4E             | Cell Signaling  | 2067        | 1:2000   | N.A.     | N.A.     |
| WB  | PDCD4             | Cell Signaling  | 9535        | 1:1000   | N.A.     | N.A.     |
| WB  | $\alpha$ -Tubulin | Cell Signaling  | 2144        | 1:2000   | N.A.     | N.A.     |
| WB  | Anti-Flag         | Sigma           | F-3165      | 1:1000   | N.A.     | N.A.     |

**Supplementary Table 1.** Antibodies and applications. Specific antibodies are listed along with dilutions used for immunohistochemistry (IHC), immunofluorescence (IF), or Western blotting (WB). Fixatives used for optimal immunostaining is also shown, when applicable. NBF, Neutral buffered formalin; PFA, Paraformaldehyde.
